# Supplementary material for: Mitochondrial HSC70-1 Regulates Polar Auxin Transport through ROS Homeostasis in Arabidopsis Roots
Source: MDPI journal article supplement (doi:10.3390/antiox11102035), 2022-10-15
Supplement: s1 [file s1]

## Supplementary data

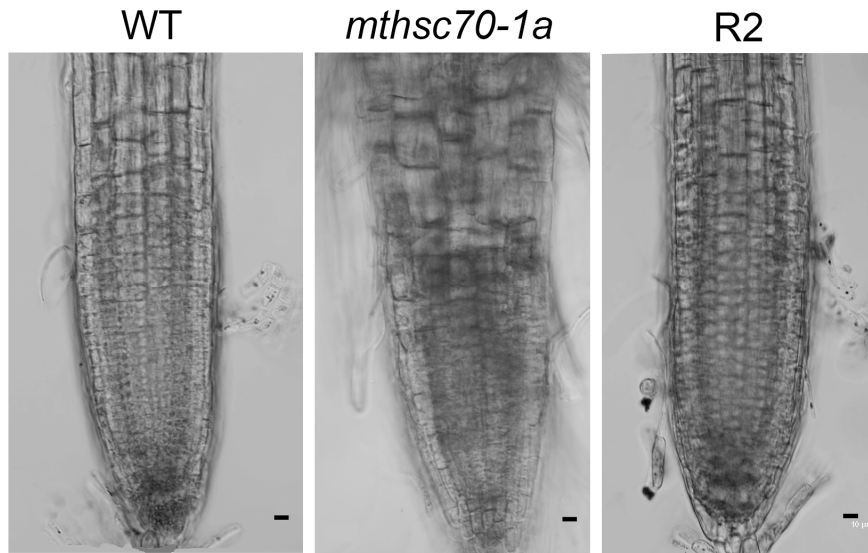

**Figure S1.** Comparison of root tip structure among wild type, *mthsc70-1a* and a complementary *mthsc70-1a* line. The roots of seven days old seedlings grown on  $0.5 \times$  MS medium supplemented with 1% sucrose were observed using a LSCM. Representative images are shown. Scale bar = 10  $\mu$ m.

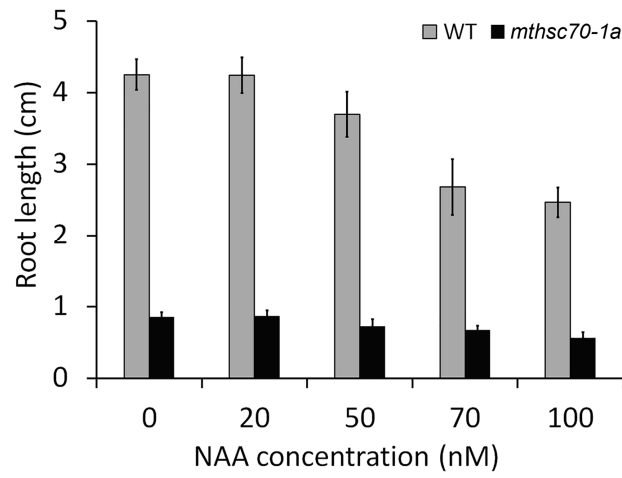

**Figure S2.** The effects of NAA treatment on primary root elongation in WT and *mtHSC70-1* mutant seedlings. Comparison of primary root length between 10-day-old WT and *mthsc70-1a* seedlings grown on 0.5 × MS medium supplemented with different concentrations of NAA. The data are the means ± SD of 30 seedlings. The experiments were repeated three times with similar results. WT, wild-type; *mthsc70-1a*, a *mtHSC70-1* mutant line.

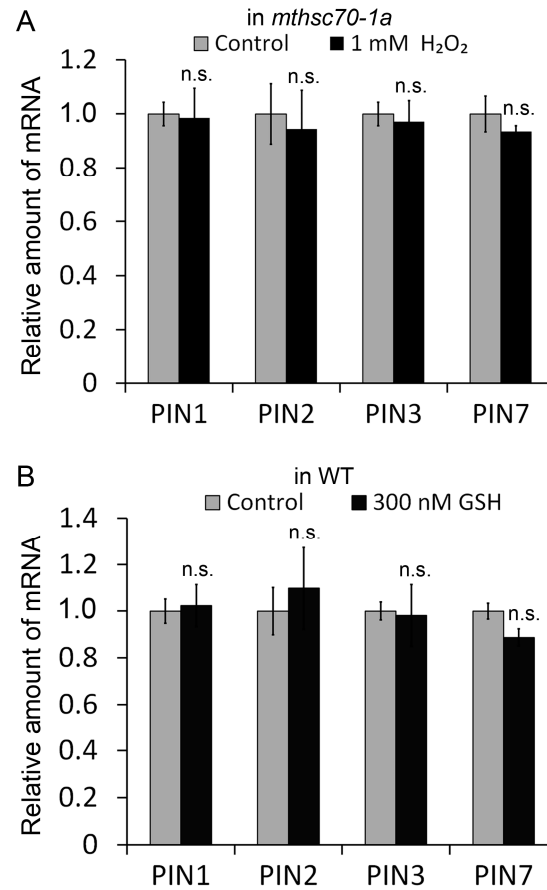

**Figure S3.** Effects of exogenous redox reagents on the expression of *PIN* genes in *mtHSC70-1* mutant and WT seedlings by Q-PCR. (A) The *mthsc70-1a* seedlings were grown on 0.5 × MS medium with or without 1 mM H<sub>2</sub>O<sub>2</sub> for 10 d. (B) The WT seedlings were grown on 0.5 × MS medium with or without 300 nM GSH for 10 d. The data are the means ± SD of three biological replicates. n.s., no significant differences from control group; WT, wild-type; *mthsc70-1a*, a *mtHSC70-1* mutant line.

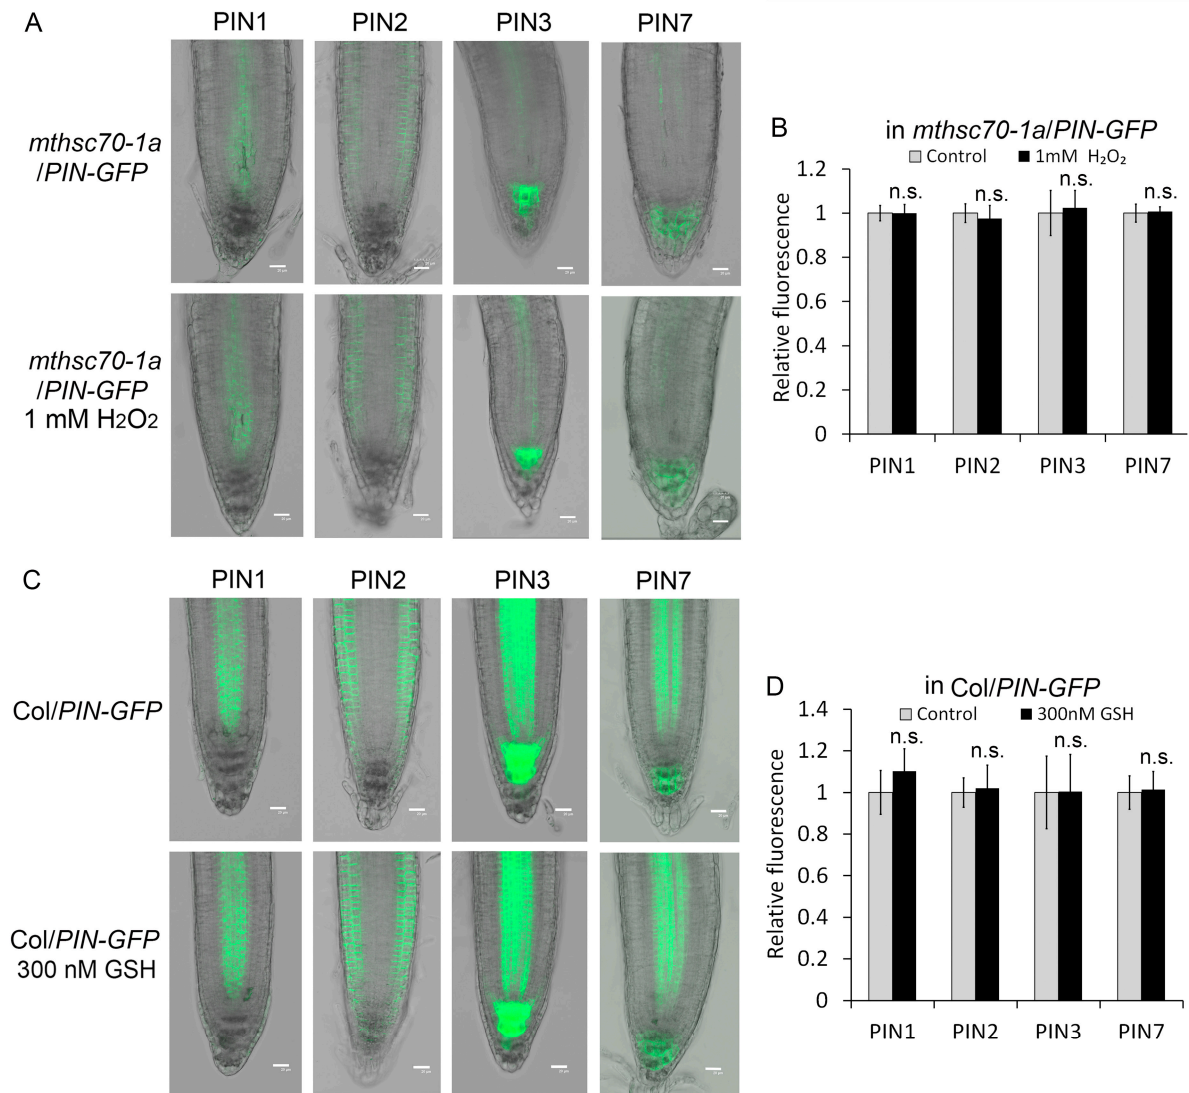

**Figure S4.** Effects of exogenous redox reagents on PIN protein levels in *mtshc70-1a*/PIN-GFP and Col/PIN-GFP root tips. (A, B) Root tips of five days old *mtshc70-1a*/PIN-GFP seedlings grown on 0.5 × MS medium with or without 1 mM H<sub>2</sub>O<sub>2</sub> were observed using a LSCM (A); the GFP fluorescence intensities were visualized with ImageJ 1.42q software (National Institutes of Health, Bethesda, MD, USA) (B). (C, D) Root tips of five days old Col/PIN-GFP seedlings grown on 0.5 × MS medium with or without 300 nM GSH were observed using a LSCM (C); the GFP fluorescence intensities were visualized with ImageJ 1.42q software (D). Thirty seedlings from each genotype and treatment were analyzed; representative images are shown. Scale bar = 20 μm. n.s., no significant differences from control group; Col/PIN-GFP, Col/PIN1-, 2-, 3- or 7-GFP plants; *mtshc70-1a*/PIN-GFP, *mtshc70-1a*/PIN1-, 2-, 3- or 7-GFP plants.

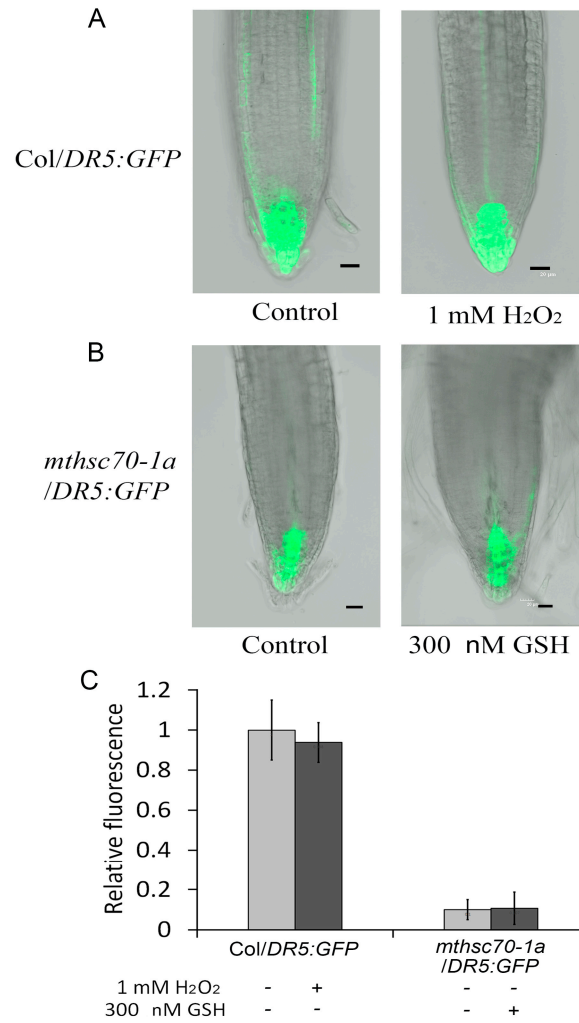

**Figure S5.** Effects of exogenous redox reagents on the auxin response. (A) Root tips of five days old *Col/DR5:GFP* seedlings grown on 0.5 × MS medium with or without 1 mM H<sub>2</sub>O<sub>2</sub> were observed using a LSCM. (B) Root tips of five days old *mthsc70-1a/DR5:GFP* seedlings grown on 0.5 × MS medium with or without 300 nM GSH were observed using a LSCM. (C) The GFP fluorescence intensities were visualized with ImageJ 1.42q software (National Institutes of Health, Bethesda, MD, USA). Thirty seedlings from each genotype and treatment were analyzed; representative images are shown. Scale bar = 20 μm. *Col/DR5:GFP*, *Col* plants harboring *DR5:GFP*; *mthsc70-1a/DR5:GFP*, *mthsc70-1a* plants harboring *DR5:GFP*.

**Table S1.** List of primers used in this study

| Locus number | Gene              | Primer sequences (5' to 3')  |
|--------------|-------------------|------------------------------|
| At1g73590    | <i>PIN1</i>       | F: CTGGTCCCTCATTTTCCTTCAAGTG |
|              |                   | R: TGAACAACCCAAGACTGAACATAGC |
| At5g57090    | <i>PIN2</i>       | F: TCCTCCATATCGCCATCGTTCAG   |
|              |                   | R: AGCATTCCTGAATATAACCGCAGTG |
| At1g70940    | <i>PIN3</i>       | F: ATGGCGGTTAGGTTTCCTTACGG   |
|              |                   | R: GCAAACACAAAGGGCACAATTCC   |
| At1g23080    | <i>PIN7</i>       | F: AGTGTGATGACTCGGCTGATATTG  |
|              |                   | R: ATCCACCTGAAAGCAACAAGAG    |
| At2g38120    | <i>AUX1</i>       | F: TGCCTCCGCTCGTCAG AATG     |
|              |                   | R: CACCGAACCCAAATCCGACTATAAG |
| At2g37620    | <i>ACTIN1</i>     | F: GGTAACATTGTGCTCAGTGGTGG   |
|              |                   | R: AACGACCTTAATCTTCATGCTGC   |
| SALK_081383  | <i>mtshc70-la</i> | L: AACACTGCAATGACACCTTCC     |
|              |                   | R: AGGATTGAAATTACCCATCGG     |
| SALK_081385  | <i>mtshc70-lb</i> | L: AACACTGCAATGACACCTTCC     |
|              |                   | R: AGGATTGAAATTACCCATCGG     |
|              | LBb1.3            | ATTTTGCCGATTTCGGAAC          |

**Table S2.** Genotypes of the transgenic lines used in this study

| Name of transgenic plant               | Genetic background |                   | Transgenic construct                   |                                   |                                   |                |                |                                  |                                  |
|----------------------------------------|--------------------|-------------------|----------------------------------------|-----------------------------------|-----------------------------------|----------------|----------------|----------------------------------|----------------------------------|
|                                        | Col                | <i>mtHSC70-1a</i> | <i>mtHSC70-1</i><br>: <i>mtHSC70-1</i> | <i>mtHSC70-1</i><br>: <i>MSD1</i> | <i>mtHSC70-1</i><br>: <i>CAT1</i> | <i>DR5:GUS</i> | <i>DR5:GFP</i> | <i>PINx:PINx</i><br>- <i>GFP</i> | <i>AUX1:AUX1</i><br>- <i>YFP</i> |
| R2, R3                                 |                    | Y                 | Y                                      |                                   |                                   |                |                |                                  |                                  |
| Col/ <i>DR5:GUS</i>                    | Y                  |                   |                                        |                                   |                                   | Y              |                |                                  |                                  |
| <i>mtHSC70-1a</i><br>/ <i>DR5:GUS</i>  |                    | Y                 |                                        |                                   |                                   | Y              |                |                                  |                                  |
| Col/ <i>DR5:GFP</i>                    | Y                  |                   |                                        |                                   |                                   |                | Y              |                                  |                                  |
| <i>mtHSC70-1a</i><br>/ <i>DR5:GFP</i>  |                    | Y                 |                                        |                                   |                                   |                | Y              |                                  |                                  |
| Col/ <i>PIN-GFP</i>                    | Y                  |                   |                                        |                                   |                                   |                |                | Y                                |                                  |
| <i>mtHSC70-1a</i><br>/ <i>PIN-GFP</i>  |                    | Y                 |                                        |                                   |                                   |                |                | Y                                |                                  |
| Col<br>/ <i>AUX1-YFP</i>               | Y                  |                   |                                        |                                   |                                   |                |                |                                  | Y                                |
| <i>mtHSC70-1a</i><br>/ <i>AUX1-YFP</i> |                    | Y                 |                                        |                                   |                                   |                |                |                                  | Y                                |
| MSD1-R2,<br>MSD1-R3                    |                    | Y                 |                                        | Y                                 |                                   |                |                |                                  |                                  |
| CAT1-R2,<br>CAT1-R3                    |                    | Y                 |                                        |                                   | Y                                 |                |                |                                  |                                  |
| R2/ <i>PIN-GFP</i>                     |                    | Y                 | Y                                      |                                   |                                   |                |                | Y                                |                                  |
| MSD1-R2<br>/ <i>PIN-GFP</i>            |                    | Y                 |                                        | Y                                 |                                   |                |                | Y                                |                                  |
| CAT1-R2<br>/ <i>PIN-GFP</i>            |                    | Y                 |                                        |                                   | Y                                 |                |                | Y                                |                                  |
| R2/ <i>DR5:GFP</i>                     |                    | Y                 | Y                                      |                                   |                                   |                | Y              |                                  |                                  |
| MSD1-R2<br>/ <i>DR5:GFP</i>            |                    | Y                 |                                        | Y                                 |                                   |                | Y              |                                  |                                  |
| CAT1-R2<br>/ <i>DR5:GFP</i>            |                    | Y                 |                                        |                                   | Y                                 |                | Y              |                                  |                                  |

Note: Col, *Arabidopsis thaliana* (Columbia-0); *mtHSC70-1a*, T-DNA insertion *mtHSC70-1* knockout plants; *PINx*, *PIN1*, *PIN2*, *PIN3* or *PIN7*; Y, yes.
